# Supplementary material
Source: publisher site journal article supplement (https://www.spandidos-publications.com/4584/downloadSupplementary)

Figure S1. Effect of treatment with a combination of phloretin and TRAIL on survival of cells from normal kidney (VERO) or lung (WI-38) cell lines. No decrease in survival was observed in VERO and WI-38 cells following treatment with (A) phloretin or (B) TRAIL. (C) No effect on the survival of cells from normal cell lines was observed following treatment with a combination of phloretin and TRAIL. TRAIL, tumor necrosis factor-related apoptosis-inducing ligand. n.s., non-significant.

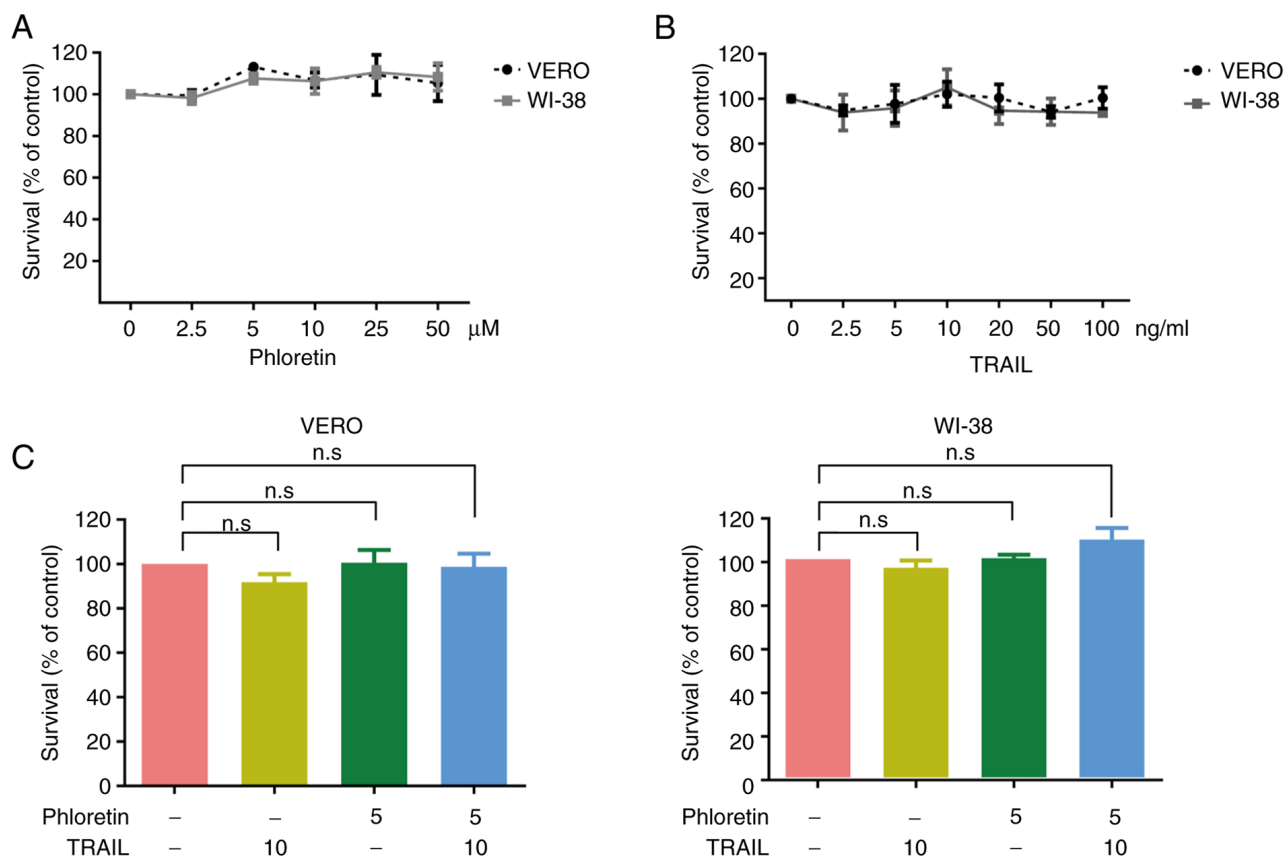

Figure S2. Increased expression levels of c-PARP, and c-caspase-3, -8 and -9 in (A) SNU283 and (B) DLD-1 cells following treatment with phloretin combined with TRAIL. Each band of c-caspase-8 is p43 and p41, respectively. c-, cleaved; PARP, poly (ADP-ribose) polymerase; TRAIL, tumor necrosis factor-related apoptosis-inducing ligand.

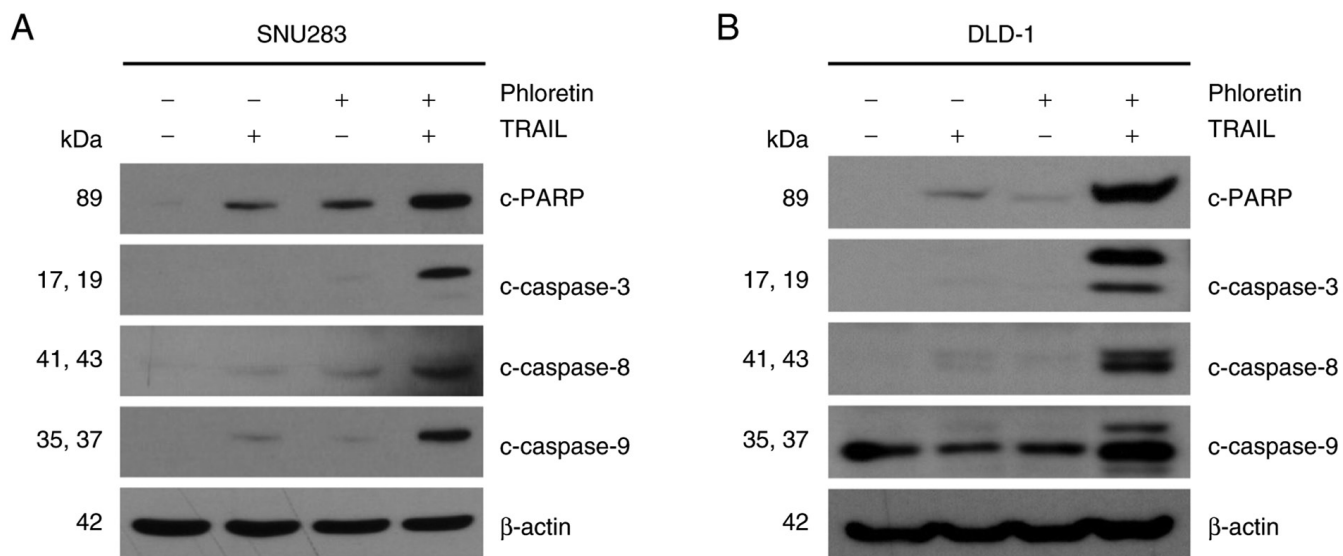

Supplement: Supplementary file 1 [file downloadSupplementary]
